# Supplementary material
Source: Springer Nature journal article supplement (https://www.springermedizin.de/resource/supplementary/13063_2008_311_MOESM1_ESM.pdf/9617954)
Supplement: MOESM1 [file 9617954]

|                                          |               |               |               |               |               |               |                    |                    |                    |                    |
|------------------------------------------|---------------|---------------|---------------|---------------|---------------|---------------|--------------------|--------------------|--------------------|--------------------|
| <b>month</b>                             | 1             | 2             | 3             | 4             | 5             | 6             | 7                  | 8                  | 9                  | 10                 |
| <b>frequency<br/>of the<br/>sessions</b> | 2 per<br>week | 2 per<br>week | 1 per<br>week | 1 per<br>week | 1 per<br>week | 1 per<br>week | 1/<br>two<br>weeks | 1/<br>two<br>weeks | 1/<br>two<br>weeks | 1/<br>two<br>weeks |
